# Supplementary material for: Hollow carbon nanospheres for targeted delivery of chemotherapeutics in breast cancer therapy
Source: Royal Society of Chemistry journal article supplement (doi:10.1039/c7tb01105a), 2017-01-01
Supplement: c7tb01105a1.pdf [file c7tb01105a1.pdf]

## Supporting Information

### **Hollow carbon nanospheres for targeted delivery of chemotherapeutics in breast cancer therapy**

Lingmin Zhang,<sup>a</sup> Peng Wang,<sup>a</sup> Wenfu Zheng,<sup>a,\*</sup> Xingyu Jiang<sup>a,b,\*</sup>

<sup>a</sup> Beijing Engineering Research Center for BioNanotechnology and CAS Key Laboratory for Biomedical Effects of Nanomaterials and Nanosafety, CAS Center for Excellence in Nanoscience, National Center for NanoScience and Technology, No. 11 Zhongguancun Beiyitiao, Beijing 100190, P. R. China.

<sup>b</sup> The University of Chinese Academy of Sciences, 19 A Yuquan Road, Shijingshan District, Beijing, 100049, P. R. China.

\* Corresponding author: E-mail addresses: zhengwf@nanoctr.cn;  
xingyujiang@nanoctr.cn (Xingyu Jiang)

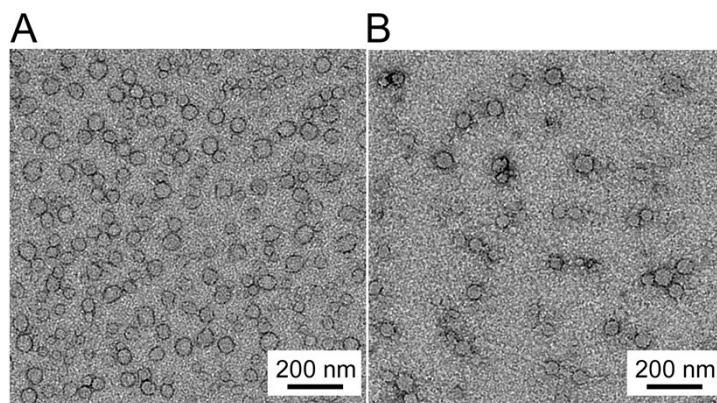

**Fig. S1** TEM images of the HCNs and its derivative: A) HCNs; B) HER2@HCNs/DOX.

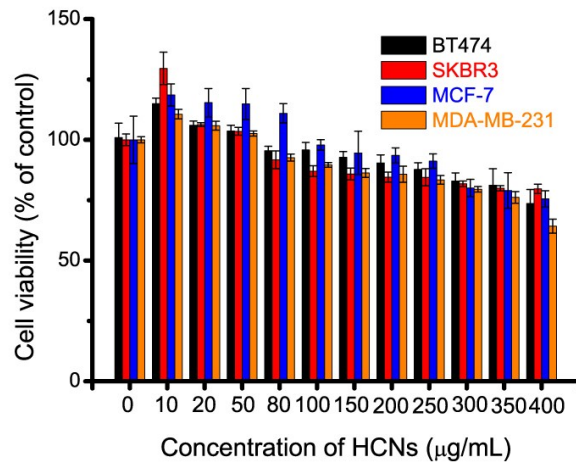

**Fig. S2** Viability of various cells after the treatment with different concentrations of HCNs. Different cell lines including BT474, SKBR3, MCF-7, and MDA-MB-231 are incubated with HCNs for 48 h.

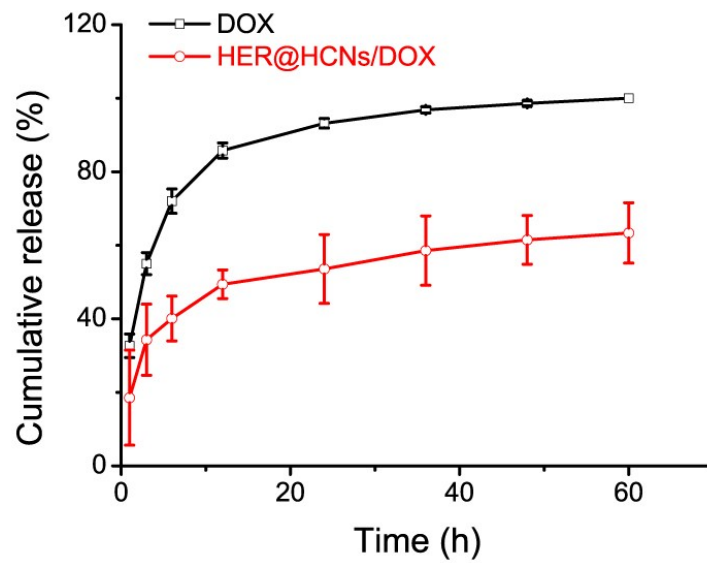

**Fig. S3** Time-dependent release of DOX from HER@HCNs/DOX (in PBS, pH 7.2).

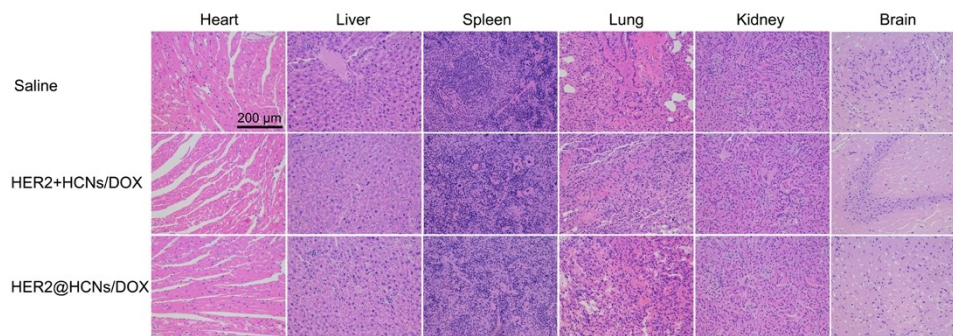

**Fig. S4** Hematoxylin-eosin staining of the tissues from the mice after drug administration for 16 days.
